# Supplementary material for: A highly sensitive caffeic acid fluorescent probe for detecting laccase in grape juice and mushrooms
Source: Royal Society of Chemistry journal article supplement (doi:10.1039/d5an00071h), 2025-01-01
Supplement: d5an00071h1.pdf [file d5an00071h1.pdf]

## *Supplementary Material*

# **A Highly Sensitive Caffeic Acid Fluorescent Probe for Detecting Laccase in Grape Juice and Mushrooms**

Haolin Zhang,<sup>a,b</sup> Zixu He,<sup>c</sup> Xiaofan Zhang<sup>d</sup> and Xiaohua Li<sup>\*c</sup>

*a. China Institute of Arts Science & Technology, Beijing 100007, PR China.*

*b. Wuhan University, Wuhan 430072, PR China.*

*c. Beijing National Laboratory for Molecular Sciences, Key Laboratory of Analytical Chemistry for Living Biosystems, Institute of Chemistry, Chinese Academy of Sciences, Beijing 100190, PR China.*

*d. Institute of Optical Functional Materials for Biomedical Imaging, School of Chemistry and Pharmaceutical Engineering, Shandong First Medical University & Shandong Academy of Medical Sciences, Taian, Shandong, 271016, PR China.*

\* The Corresponding Author:

Xiao-hua Li; E-mail: lixh@iccas.ac.cn

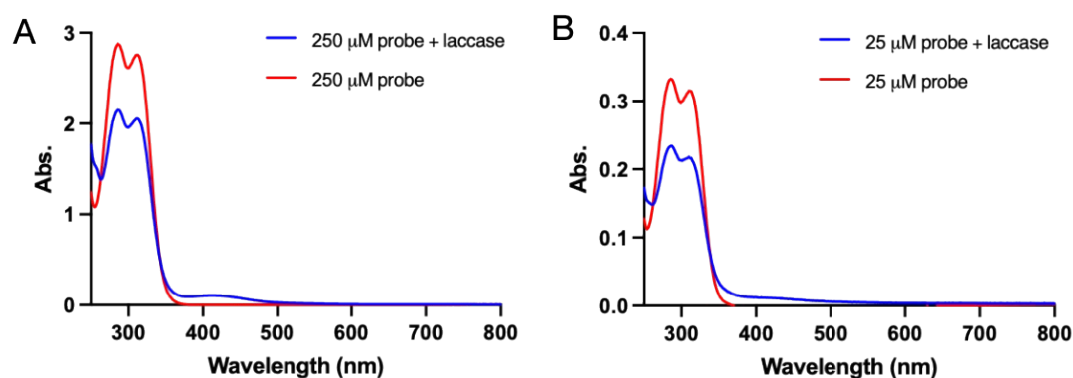

Fig. S1 Full absorption spectra of 250  $\mu\text{M}$  EC (A) and 25  $\mu\text{M}$  EC (B) with or without laccase (2.5  $\mu\text{g}/\text{mL}$  or 0.25  $\mu\text{g}/\text{mL}$ ) in 20 mM phosphate buffer (pH 7.4) at 25  $^{\circ}\text{C}$ .

| Ref              | $\lambda_{\text{ex/em}}$<br>(nm) | Linearity                                     | pH         | Detection<br>limit                             | Application                              |
|------------------|----------------------------------|-----------------------------------------------|------------|------------------------------------------------|------------------------------------------|
| (1) <sup>1</sup> | 530/583                          | 5.62 - 702 U/L                                | 5.5        | 1.76 U/L                                       | Soil Samples                             |
| (2) <sup>2</sup> | 330/458                          | 0 - 100 $\mu\text{g}/\text{mL}$               | 6.0        | 0.47 $\mu\text{g}/\text{mL}$                   | Conformational<br>Flexibility of Laccase |
| (3) <sup>3</sup> | 650/680                          | 10 - 32 $\mu\text{g}/\text{mL}$               | 3.0        | 9 U/L                                          | Mushroom Extracts                        |
| (4) <sup>4</sup> | 330/466                          | 0 - 400 U/L                                   | 6.0        | 2.0 U/L                                        | Human Serum<br>Samples                   |
| (5) <sup>5</sup> | 530                              | 100–10000 U/L                                 | 6.0        | ---                                            | ---                                      |
|                  | (absorbance)                     |                                               |            |                                                |                                          |
| <b>EC</b>        | <b>395/470</b>                   | <b>0-5 <math>\mu\text{g}/\text{mL}</math></b> | <b>7.4</b> | <b>0.24 <math>\mu\text{g}/\text{mL}</math></b> | <b>Grape Juice and<br/>Mushrooms</b>     |

**Table S1.** Comparison of EC with other reported laccase sensors.

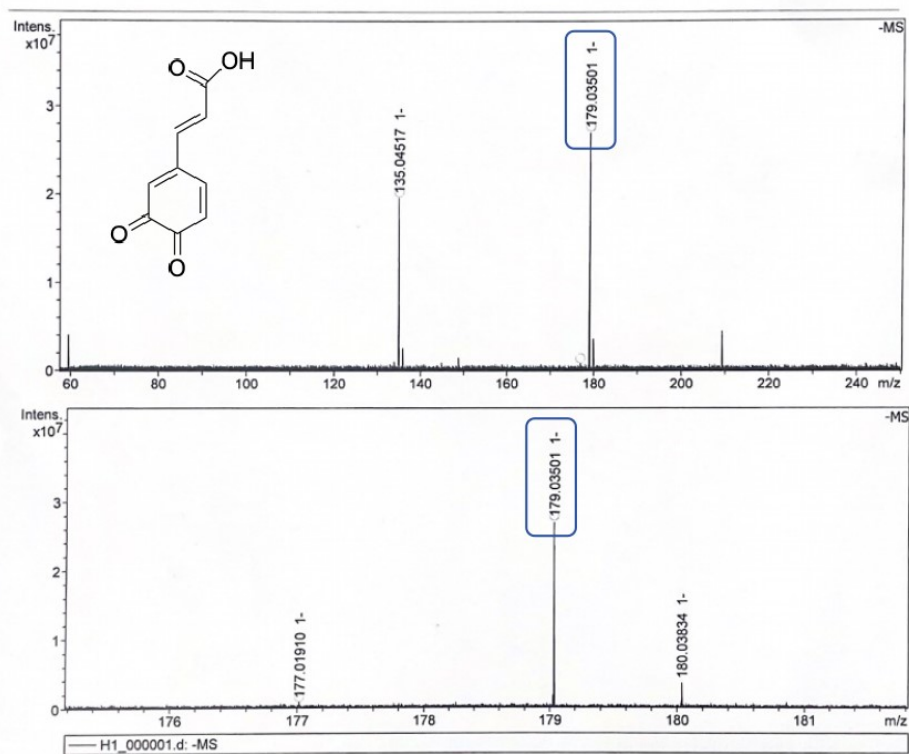

Fig. S2 HR-MS data of the product of the reaction between EC and laccase. HR-ESI-MS: m/z calcd. (C<sub>9</sub>H<sub>6</sub>O<sub>4</sub>, [M]<sup>+</sup>), 179.0300; found, 179.0350.

- 1□ T. Wang, Y. Xiang, X. Liu, W. Chen and Y. Hu, *Talanta*, 2017, **162**, 143-150.
- 2□ S. Qiu, Z. Lin, Y. Zhou, R. Li, J. Zhang, D. Zhang, L. Luo, L. Guo, B. Qiu and G. Chen, *Anal Chem*, 2013, **85**, 11041-11046.
- 3□ M. S. Arabi, C. Karami, M. A. Taher and E. Ahmadi, *J Biol Inorg Chem*, 2020, **25**, 151-159.
- 4□ J. Ren, K. Danchana, K. Sasaki and T. Kaneta, *Journal of Food Composition and Analysis*, 2023, **123**. 105627.
- 5□ K. Pashangeh, M. R. Hormozi-Nezhad, M. Akhond and G. Absalan, *Plasmonics*, 2017, **13**, 1409-1415.
